# Supplementary material
Source: PubMed Central journal article supplement (PMC1832004)
Supplement: bmj_334_7594_614__1.pdf [file bmj_334_7594_614__1.pdf]

## Web references

- w1. Home Office. *Updated national drugs strategy*. London: Stationery Office, 2002. [www.drugs.gov.uk/publication-search/drug-strategy/updated-drug-strategy-2002.pdf?view=Standard&pubID=191758](http://www.drugs.gov.uk/publication-search/drug-strategy/updated-drug-strategy-2002.pdf?view=Standard&pubID=191758).
- w2. Ermisch J. *Does a teen-birth have longer-term impacts on the mother? Suggestive evidence from the British household panel survey*. Colchester: Institute for Social and Economic Research, 2003.
- w3. Pevalin DJ. *Outcomes in childhood and adulthood by mother's age: evidence from the 1970 British cohort study*. Colchester: Institute for Social and Economic Research, 2003.
- w4. Social Exclusion Unit. *Teenage pregnancy*. London: HMSO, 1999.
- w5. Department for Education and Skills. *Every child matters: change for children*. London: Stationery Office, 2004. [www.everychildmatters.gov.uk/files/F9E3F941DC8D4580539EE4C743E9371D.pdf](http://www.everychildmatters.gov.uk/files/F9E3F941DC8D4580539EE4C743E9371D.pdf).
- w6. Department for Health. *Choosing health: making healthier choices easier*. London: Stationery Office, 2004. [www.dh.gov.uk/assetRoot/04/12/07/92/04120792.pdf](http://www.dh.gov.uk/assetRoot/04/12/07/92/04120792.pdf).
- w7. Macbeath J, Meuret D, Schratz, M. *Evaluating quality in school education: a European pilot project*. Brussels: European Commission. 1997.
- w8. Fitz-Gibbon CT. *Monitoring education: indicators, quality and effectiveness*. London: Cassell, 1996.
- w9. Turner K, West P, Gordon J, Young R, Sweeting H. Could the peer group explain school differences in pupil smoking rates? An exploratory study. *Soc Sci Med* 2006;62:2513-25
- w10. Bourgois P. *In search of respect: selling crack in El Barrio*. New York: Cambridge University Press, 1995.
- w11. Arai L. Peer and neighbourhood influences on teenage pregnancy and fertility: qualitative findings from research in English communities. *Health Place* 2007;13:87-98.
- w12. Advisory Council on the Misuse of Drugs. *Pathways to Problems. Hazardous use of tobacco, alcohol and other drugs by young people in the UK and its implications for policy*. London: ACMD, 2006.
- w13. Department of Health, Department for Education and Skills. *National healthy school status. A guide for schools*. London: DH/DfES, 2005. [www.wiredforhealth.gov.uk/cat.php?catid=842](http://www.wiredforhealth.gov.uk/cat.php?catid=842).
- w14. Warwick I, Aggleton, Chase E, Zuurmond M, Blenkinsop S, Eggers M, et al. *Evaluation of the impact of the national healthy school standard*. London, Institute of Education, National Foundation for Educational Research, 2004.
- w15. Department for Education and Skills. *Pupil absence in England 2004/05: statistical first release*. London: DfES, 2005. [www.dfes.gov.uk/rsgateway/DB/SFR/s000602/index.shtml](http://www.dfes.gov.uk/rsgateway/DB/SFR/s000602/index.shtml).
